# Supplementary material for: Disentangling effects of anthropogenic disturbance and community structure on multi-pathogen dynamics in tropical cave-dwelling bat communities
Source: Research Square preprint supplement (doi:10.21203/rs.3.rs-3073229/v1), 2023-06-20
Supplement: Supplementary file 1 [file 9e88d814427eccd0d3680711.docx]

**Supplementary information**

**
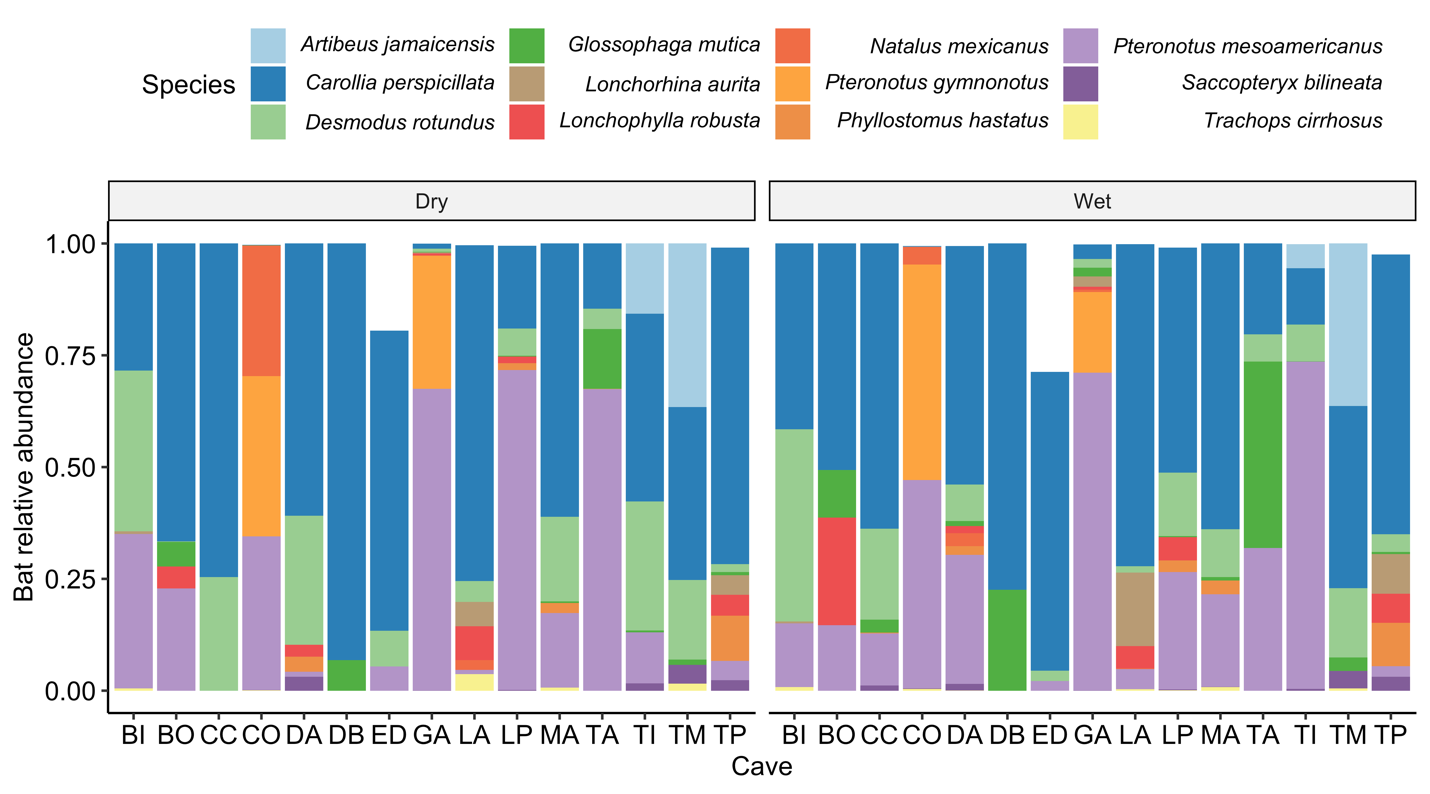
Fig. S1: Relative abundance by cave and season** of 12 bat species most found in 15 caves sampled in dry and wet seasons in Costa Rica. Blank spaces are from bat species that only occurred in those sites and are excluded from the plot. Cave abbreviations can be found in Table S1.

**
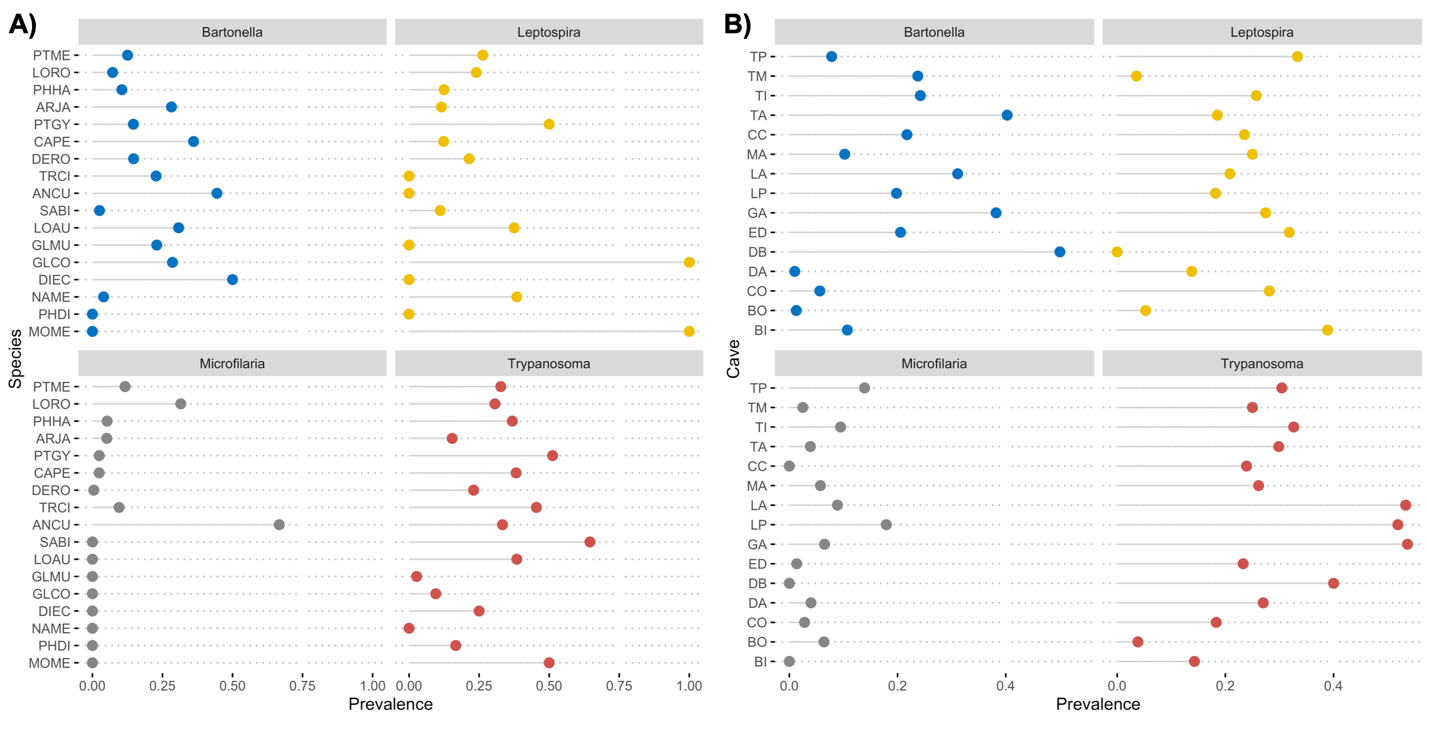
**

**Fig. S2. Pathogen prevalence.** Pathogen prevalence across A) caves and B) bat species for 15 cave-dwelling bat assemblages in Costa Rica. Caves and species abbreviations can be found in Table S1.


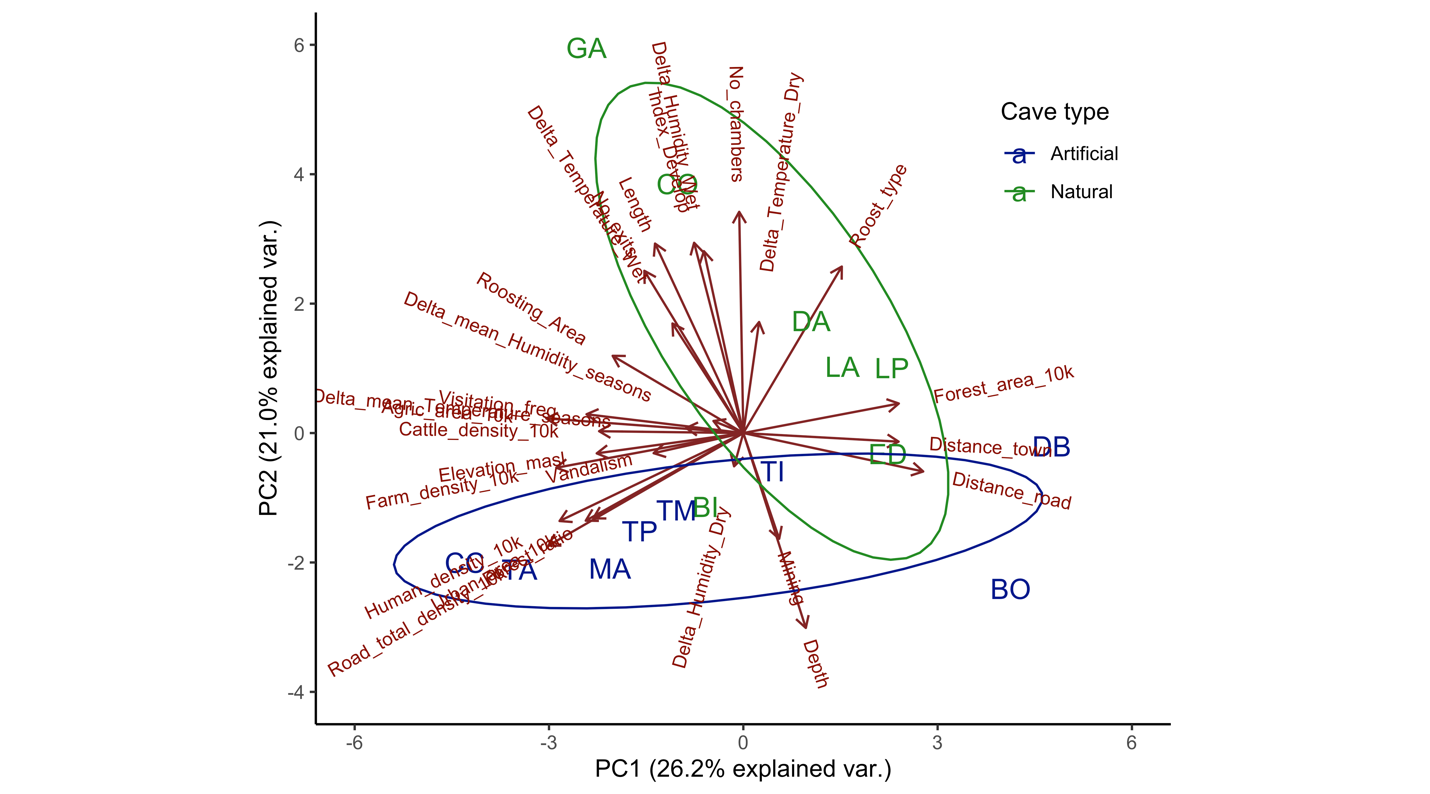


**Fig. S3: Principal component analysis.** Loadings of environmental and disturbance data (red) taken from 15 caves sampled in Costa Rica on the first two principal components. Caves abbreviations can be found in Table S1.


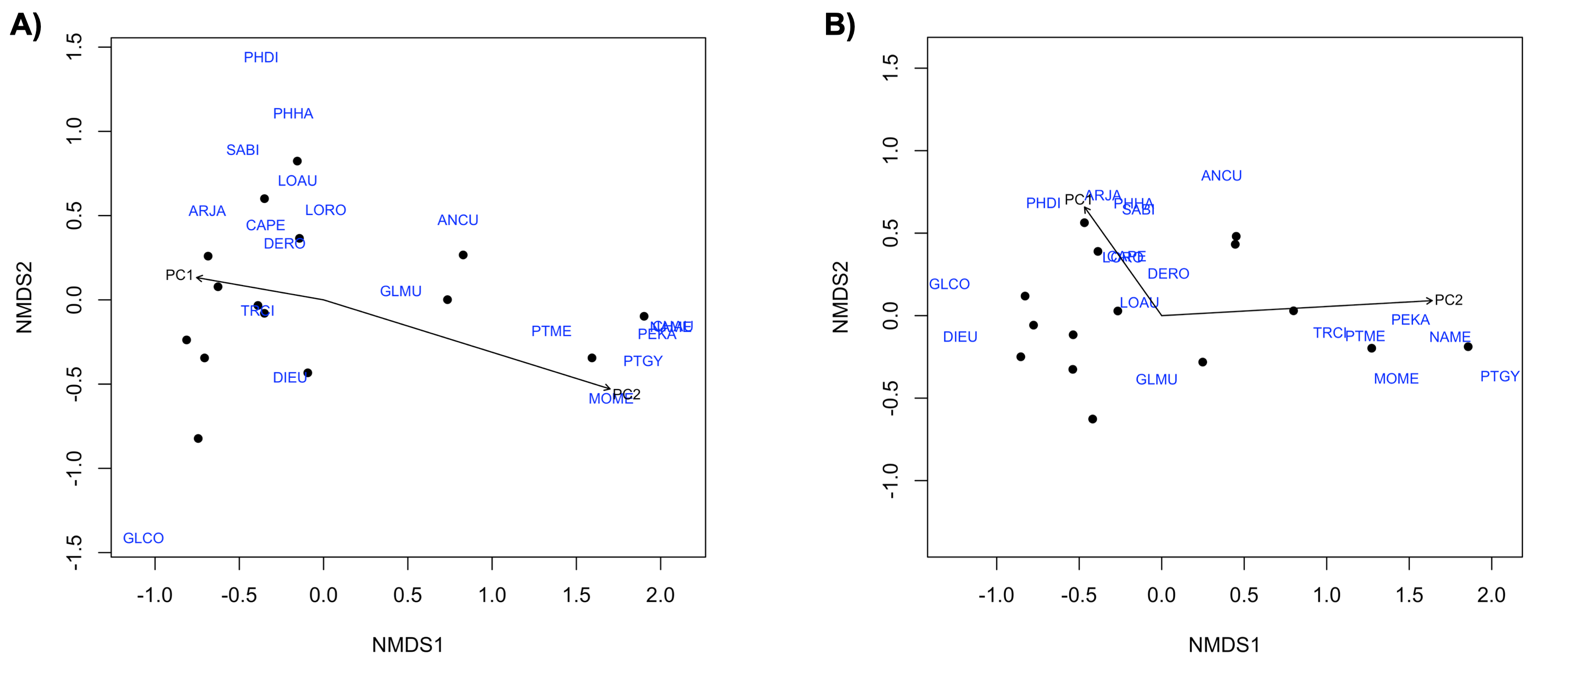


**Fig. S4: Cave complexity affects bat community composition.** Non-metric multidimensional scaling (NMDS) showing bat assemblages in the A) dry and B) wet seasons for 15 caves sampled in Costa Rica, using Bray-Curtis similarity (dry stress = 0.08, wet stress = 0.09). Black dots represent the caves, and bat species are in blue. The vectors indicate the effect of habitat quality (PC1) and cave complexity (PC2) on bat community assemblage. Species abbreviations can be found in Table S1.


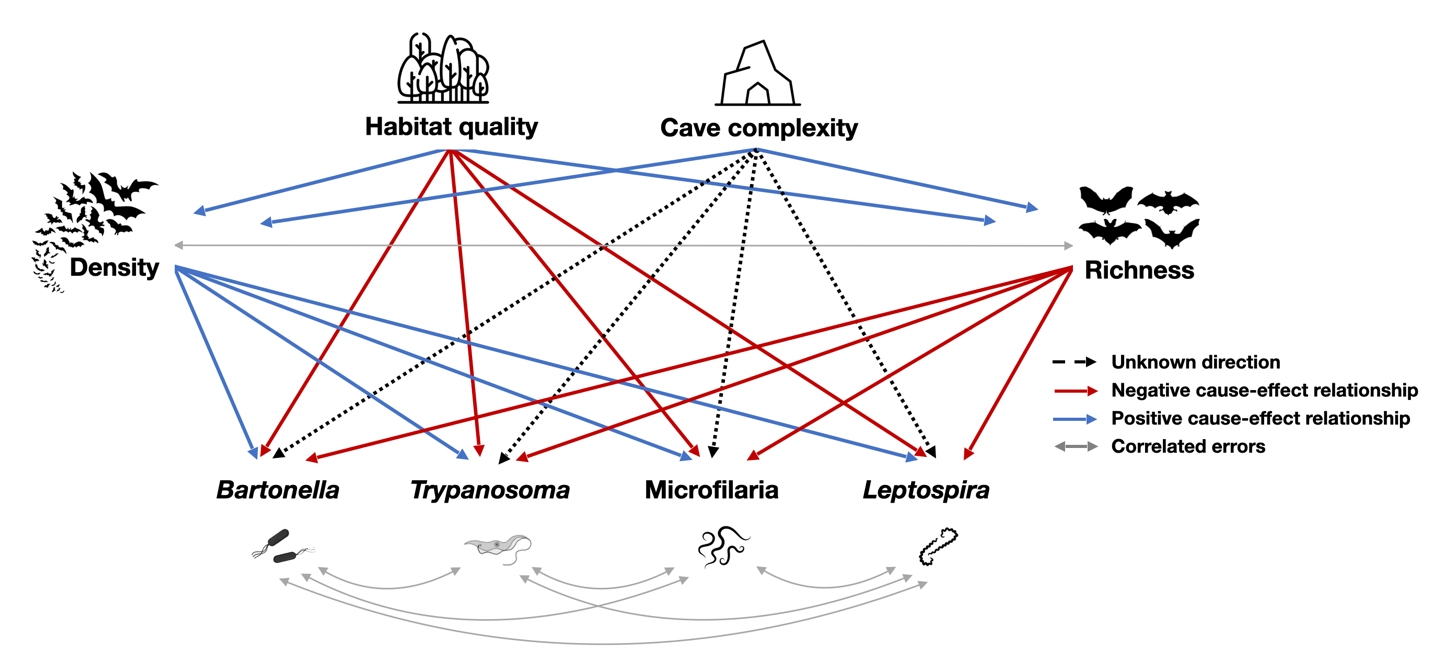


**Fig. S5: Hypothesized structural equation model.** A priori hypothesized model based on previous research. Habitat quality (PC1) and cave complexity (PC2) are expected to increase both bat density and richness, as has been shown in our analysis and previous work 43. Moreover, bat density is expected to increase pathogen prevalence, while richness is expected to decrease prevalence, if the negative association of biodiversity and disease (i.e., dilution effect 61) is as common as it has been reported 3. Greater habitat quality is expected to decrease pathogen prevalence, while the association of cave complexity to pathogen prevalence is unknown.

**Table S1.** Codes of caves and bat species studied in Costa Rica.

| **Cave** | **code** | **Species** | **code** |
| --- | --- | --- | --- |
| Bijagual | BI | *Anoura cultrata* | ANCU |
| Bombaza | BO | *Artibeus jamaicensis* | ARJA |
| Corredores | CO | *Carollia perspicillata* | CAPE |
| Damas | DA | *Chrotopterus auritus* | CHAU |
| Dos Brazos | DB | *Desmodus rotundus* | DERO |
| El Duende | ED | *Diphylla ecaudata* | DIEC |
| Gabinarraca | GA | *Glossophaga commissarisi* | GLCO |
| Laguna Perdida | LP | *G. mutica* | GLMU |
| Los Araya | LA | *Lonchophylla robusta* | LORO |
| Mina Aguacate | MA | *Lonchorhina aurita* | LOAU |
| Mina Ciudad Colón | CC | *Mormoops megalophylla* | MOME |
| Túnel Arenal | TA | *Natalus mexicanus* | NAME |
| Túnel ICE 2 | TI | *Peropteryx kappleri* | PEKA |
| Túnel Miraflores | TM | *Phyllostomus discolor* | PHDI |
| Túnel Peralta | TP | *Phyllostomus hastatus* | PHHA |
|  |  | *Pteronotus gymnonotus* | PTGY |
|  |  | *P. mesoamericanus* | PTME |
|  |  | *Saccopteryx bilineata* | SABI |
|  |  | *Trachops cirrhosus* | TRCI |

**Table S2**. Results of PERMANOVA comparing the effects of habitat quality (PC1) and cave complexity (PC2) on bat community composition in the dry and wet season in Costa Rica. Significant results are in bold.

|  | **Sum of sqs** | **R2** | **F** | **p-value** |
| --- | --- | --- | --- | --- |
| **Dry** |  |  |  |  |
| PC1 | 0.201 | 0.060 | 1.075 | 0.337 |
| PC2 | 0.879 | 0.264 | 4.693 | **0.012** |
| Residual | 2.247 | 0.675 |  |  |
|  |  |  |  |  |
| **Wet** |  |  |  |  |
| PC1 | 0.179 | 0.057 | 1.029 | 0.365 |
| PC2 | 0.880 | 0.279 | 5.047 | **0.001** |
| Residual | 2.091 | 0.664 |  |  |

**Table S3.** The full path model statistics including unstandardized and standardized estimated pathway coefficients and corresponding p-values for the dry and the wet season. R2 is shown for each response variable. The last seven rows are correlated errors. Significant pathway p-values are bolded. The *c* denotes that the path is constrained among seasons. Path model is visualized in Fig. 3.

| **Response** | **Predictor** | **Dry** | | | | **Wet** | | | | **R2** |
| --- | --- | --- | --- | --- | --- | --- | --- | --- | --- | --- |
|  |
| **Estimate** | **Sdt. Error** | **Standardized Estimate** | **p-value** | **Estimate** | **Sdt. Error** | **Standardized Estimate** | **p-value** |  |
| **Richness** | PC1 | -0.044 | 0.030 | - | 0.139 | c | c | - | c | 0.39 |  |
| PC2 | 0.095 | 0.027 | - | **0.000** | c | c | - | **c** |  |  |
| **Log.density** | PC1 | 0.285 | 0.067 | 0.608 | **0.000** | c | c | 0.599 | **c** | 0.46 |  |
|  | PC2 | 0.163 | 0.075 | 0.312 | **0.038** | c | c | 0.307 | **c** |  |  |
| ***Bartonella*** | PC1 | -0.292 | 0.061 | -0.409 | **0.000** | 0.238 | 0.070 | 0.327 | **0.001** | 0.52 |  |
|  | PC2 | 0.167 | 0.040 | 0.216 | **0.000** | c | c | 0.216 | **c** |  |  |
|  | Richness | -0.098 | 0.042 | -0.150 | **0.019** | c | c | -0.140 | **c** |  |  |
|  | Log.density | 0.296 | 0.129 | 0.194 | **0.022** | -0.589 | 0.138 | -0.385 | **0** |  |  |
| ***Trypanosoma*** | PC1 | -0.004 | 0.052 | -0.006 | 0.937 | 0.191 | 0.070 | 0.261 | **0.006** | 0.91 |  |
|  | PC2 | 0.011 | 0.035 | 0.013 | 0.760 | c | c | 0.013 | c |  |  |
|  | Richness | 0.220 | 0.038 | 0.328 | **0.000** | c | c | 0.306 | **c** |  |  |
|  | Log.density | -0.104 | 0.081 | -0.068 | 0.204 | c | c | -0.069 | c |  |  |
| **Microfilaria** | PC1 | 0.185 | 0.087 | 0.254 | **0.033** | c | c | 0.254 | **c** | 0.62 |  |
|  | PC2 | -0.202 | 0.068 | -0.248 | **0.003** | c | c | -0.248 | **c** |  |  |
|  | Richness | 0.366 | 0.079 | 0.533 | **0.000** | c | c | 0.497 | **c** |  |  |
|  | Log.density | -0.133 | 0.168 | -0.086 | 0.427 | c | c | -0.087 | c |  |  |
| ***Leptospira*** | PC1 | -0.061 | 0.073 | -0.089 | 0.399 | c |  | -0.089 | c | 0.13 |  |
|  | PC2 | 0.063 | 0.066 | 0.082 | 0.344 | c |  | 0.082 | c |  |  |
|  | Richness | -0.024 | 0.071 | -0.037 | 0.737 | c |  | -0.035 | c |  |  |
|  | Log.density | -0.106 | 0.143 | -0.072 | 0.460 | c |  | -0.073 | c |  |  |
| ***Bartonella*** | *Trypanosoma* | 0.740 | - | 0.740 | **0.001** | 0.628 | - | 0.628 | **0.008** |  |  |
| ***Bartonella*** | *Leptospira* | 0.168 | - | 0.168 | 0.283 | -0.741 | - | -0.741 | **0.001** |  |  |
| ***Bartonella*** | Microfilaria | -0.287 | - | -0.287 | 0.160 | 0.122 | - | 0.122 | 0.339 |  |  |
| ***Trypanosoma*** | *Leptospira* | 0.231 | - | 0.231 | 0.214 | -0.233 | - | -0.233 | 0.212 |  |  |
| ***Trypanosoma*** | Microfilaria | 0.009 | - | 0.009 | 0.487 | -0.135 | - | -0.135 | 0.322 |  |  |
| **Microfilaria** | *Leptospira* | 0.409 | - | 0.409 | 0.073 | -0.217 | - | -0.217 | 0.228 |  |  |
| **Richness** | Log.density | 0.318 | - | 0.318 | 0.134 | 0.292 | - | 0.292 | 0.155 |  |  |
